# Supplementary material for: Crucial factors preceding compulsory psychiatric admission: a qualitative patient-record study
Source: PubMed Central journal article supplement (PMC5655985; doi:10.1186/s12888-017-1512-y), 2017-10-24

**Additional material:**

*Anonymized example of a  
PRISMA tree of causes*

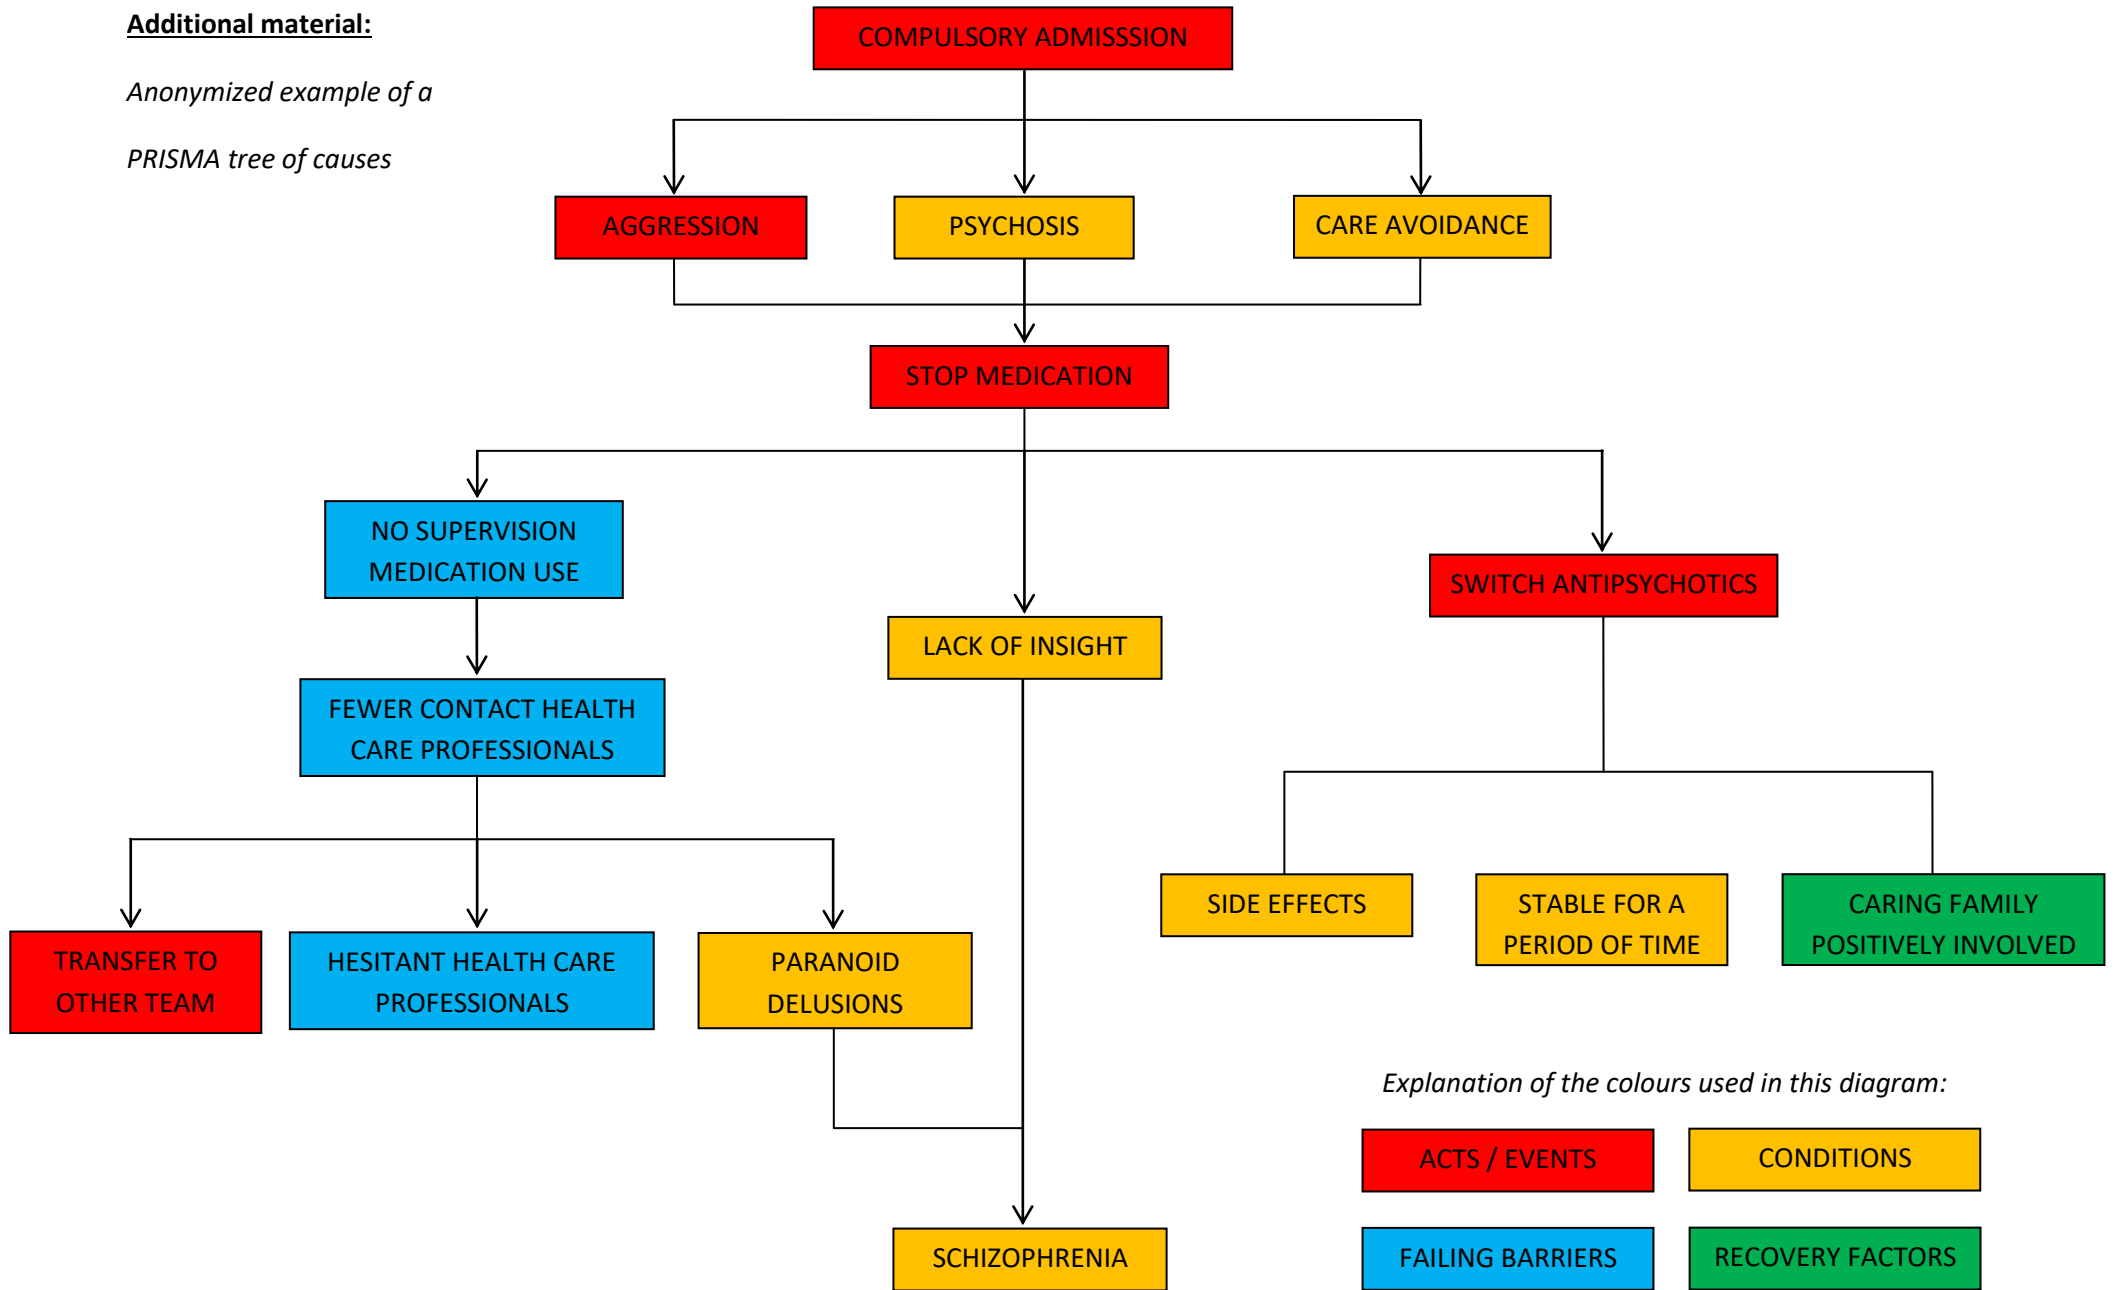

Supplement: 12888_2017_1512_MOESM1_ESM.pdf [file 12888_2017_1512_MOESM1_ESM.pdf]
